# Supplementary material for: Application of quantile mixed-effects model in modeling CD4 count from HIV-infected patients in KwaZulu-Natal South Africa
Source: Springer Nature journal article supplement (doi:10.1186/s12879-021-06942-7), 2022-01-04
Supplement: MOESM1 [file 19999284]

**Application of quantile mixed-effects model in modeling CD4 count from HIV-infected patients in KwaZulu-Natal, South Africa**

Ashenafi A Yirga<sup>1\*</sup>, Sileshi F Melesse<sup>1</sup>, Henry G Mwambi<sup>1</sup> and Dawit G Ayele<sup>2</sup>

1. School of Mathematics, Statistics, and Computer Science, University of KwaZulu-Natal, Pietermaritzburg, Private Bag X01, Scottsville, 3209, South Africa.
2. Institute of Human Virology, University of Maryland, School of Medicine, USA.

\*Corresponding Author: Ashenafi Argaw Yirga, Ph.D. Candidate  
University of KwaZulu-Natal  
Pietermaritzburg, South Africa

Email: [ashu3argaw@gmail.com](mailto:ashu3argaw@gmail.com), or [216065934@stu.ukzn.ac.za](mailto:216065934@stu.ukzn.ac.za)

**Additional file1:** R package *qrLMM()* sample outputs using CAPRISA 002 Acute Infection Study data across all fitted quantile levels.

-----  
Quantile Regression for Linear Mixed Model  
-----

Quantile = **0.05** 0.25 0.5 0.75 0.85 0.95  
Subjects = 235 ; observations = 7019

-----  
Estimates  
-----

- Fixed effects

|        | Estimate | Std. Error | Inf CI95% | Sup CI95% | z value  | Pr(> z ) |
|--------|----------|------------|-----------|-----------|----------|----------|
| beta 1 | 19.99675 | 1.16072    | 17.72173  | 22.27177  | 17.22783 | 0.00000  |
| beta 2 | 0.06294  | 0.01473    | 0.03407   | 0.09180   | 4.27392  | 0.00002  |
| beta 3 | -0.86567 | 0.14159    | -1.14319  | -0.58815  | -6.11395 | 0.00000  |
| beta 4 | 0.05642  | 0.02067    | 0.01590   | 0.09694   | 2.72903  | 0.00635  |
| beta 5 | -0.56383 | 0.07799    | -0.71670  | -0.41096  | -7.22912 | 0.00000  |
| beta 6 | 1.68287  | 0.05379    | 1.57744   | 1.78830   | 31.28520 | 0.00000  |
| beta 7 | 0.02073  | 0.02500    | -0.02826  | 0.06972   | 0.82939  | 0.40688  |

ii) Variance-Covariance Matrix

|    | z1       | z2       | z3       |
|----|----------|----------|----------|
| z1 | 24.80823 | 0.22416  | -3.39361 |
| z2 | 0.22416  | 0.03539  | -0.26853 |
| z3 | -3.39361 | -0.26853 | 2.72345  |

-----  
Model selection criteria  
-----

|       | Loglik    | AIC      | BIC      | HQ       |
|-------|-----------|----------|----------|----------|
| Value | -18454.68 | 36937.36 | 37033.35 | 36970.43 |

-----  
Details  
-----

Convergence reached? = TRUE  
Iterations = 418 / 500  
Criteria = 0.00046  
MC sample = 20  
Cut point = 0.25  
Processing time = 2.725659 hours

-----  
Quantile Regression for Linear Mixed Model  
-----

Quantile = 0.05 **0.25** 0.5 0.75 0.85 0.95  
Subjects = 235 ; observations = 7019

-----  
Estimates  
-----

- Fixed effects

|        | Estimate | Std. Error | Inf CI95% | Sup CI95% | z value  | Pr(> z ) |
|--------|----------|------------|-----------|-----------|----------|----------|
| beta 1 | 22.17136 | 1.40335    | 19.42079  | 24.92193  | 15.79884 | 0.00000  |
| beta 2 | 0.06979  | 0.01369    | 0.04296   | 0.09661   | 5.09845  | 0.00000  |
| beta 3 | -0.87112 | 0.12946    | -1.12486  | -0.61738  | -6.72888 | 0.00000  |
| beta 4 | 0.07836  | 0.02432    | 0.03070   | 0.12602   | 3.22263  | 0.00127  |
| beta 5 | -0.56874 | 0.10345    | -0.77149  | -0.36598  | -5.49793 | 0.00000  |
| beta 6 | 2.12541  | 0.07329    | 1.98176   | 2.26907   | 28.99856 | 0.00000  |
| beta 7 | 0.02957  | 0.02972    | -0.02868  | 0.08781   | 0.99496  | 0.31975  |

sigma = 0.68658

Random effects Variance-Covariance Matrix matrix

|    | z1       | z2       | z3       |
|----|----------|----------|----------|
| z1 | 17.94444 | 0.15706  | -2.85704 |
| z2 | 0.15706  | 0.02222  | -0.19180 |
| z3 | -2.85704 | -0.19180 | 2.12359  |

-----  
Model selection criteria  
-----

|       | Loglik    | AIC      | BIC      | HQ       |
|-------|-----------|----------|----------|----------|
| value | -17169.85 | 34367.69 | 34463.68 | 34400.77 |

-----  
Details  
-----

Convergence reached? = TRUE  
Iterations = 477 / 500  
Criteria = 0.00041  
MC sample = 20  
Cut point = 0.25  
Processing time = 2.915623 hours

-----  
"Quantile Regression for Linear Mixed Model  
-----

Quantile = 0.05 0.25 **0.5** 0.75 0.85 0.95

Subjects = 235; Observations = 7019  
-----

Estimates  
-----

- Fixed effects

|        | Estimate | Std. Error | Inf CI95% | Sup CI95% | z value  | Pr(> z ) |
|--------|----------|------------|-----------|-----------|----------|----------|
| beta 1 | 24.62849 | 1.46389    | 21.75927  | 27.49770  | 16.82404 | 0.00000  |
| beta 2 | 0.05678  | 0.01285    | 0.03159   | 0.08197   | 4.41807  | 0.00001  |
| beta 3 | -0.69589 | 0.11792    | -0.92702  | -0.46477  | -5.90142 | 0.00000  |
| beta 4 | 0.08170  | 0.02699    | 0.02879   | 0.13461   | 3.02638  | 0.00248  |
| beta 5 | -0.64095 | 0.09631    | -0.82972  | -0.45219  | -6.65513 | 0.00000  |
| beta 6 | 2.56004  | 0.08808    | 2.38740   | 2.73268   | 29.06490 | 0.00000  |
| beta 7 | 0.02935  | 0.03125    | -0.03191  | 0.09060   | 0.93898  | 0.34774  |

sigma = 0.87713

Random effects Variance-Covariance Matrix

|    | z1       | z2       | z3       |
|----|----------|----------|----------|
| z1 | 17.69164 | 0.16071  | -2.93488 |
| z2 | 0.16071  | 0.02010  | -0.18231 |
| z3 | -2.93488 | -0.18231 | 2.03916  |

-----  
Model selection criteria  
-----

|       | Loglik    | AIC      | BIC      | HQ       |
|-------|-----------|----------|----------|----------|
| value | -16828.96 | 33685.92 | 33781.91 | 33718.99 |

-----  
Details  
-----

Convergence reached? = TRUE  
Iterations = 433 / 500  
Criteria = 0.00036  
MC sample = 20  
Cut point = 0.25  
Processing time = 2.591965 hours"

-----  
Quantile Regression for Linear Mixed Model  
-----

Quantile = 0.05 0.25 0.5 **0.75** 0.85 0.95  
Subjects = 235 ; observations = 7019

-----  
Estimates  
-----

- Fixed effects

|        | Estimate | Std. Error | Inf CI95% | Sup CI95% | z value  | Pr(> z ) |
|--------|----------|------------|-----------|-----------|----------|----------|
| beta 1 | 26.59571 | 1.41986    | 23.81279  | 29.37863  | 18.73127 | 0.00000  |
| beta 2 | 0.04600  | 0.01321    | 0.02011   | 0.07189   | 3.48205  | 0.00050  |
| beta 3 | -0.59311 | 0.11969    | -0.82770  | -0.35852  | -4.95549 | 0.00000  |
| beta 4 | 0.11195  | 0.03207    | 0.04910   | 0.17480   | 3.49109  | 0.00048  |
| beta 5 | -0.71365 | 0.09390    | -0.89770  | -0.52960  | -7.59987 | 0.00000  |
| beta 6 | 3.02180  | 0.09680    | 2.83208   | 3.21152   | 31.21830 | 0.00000  |
| beta 7 | 0.02988  | 0.03154    | -0.03194  | 0.09170   | 0.94725  | 0.34351  |

sigma = 0.70722

Random effects Variance-Covariance Matrix matrix

|    | z1       | z2       | z3       |
|----|----------|----------|----------|
| z1 | 19.23673 | 0.11625  | -2.57316 |
| z2 | 0.11625  | 0.01980  | -0.18194 |
| z3 | -2.57316 | -0.18194 | 2.04732  |

-----  
Model selection criteria  
-----

|       | Loglik    | AIC      | BIC      | HQ       |
|-------|-----------|----------|----------|----------|
| Value | -17344.63 | 34717.25 | 34813.24 | 34750.33 |

-----  
Details  
-----

Convergence reached? = FALSE  
Iterations = 500 / 500  
Criteria = 5e-04  
MC sample = 20  
Cut point = 0.25  
Processing time = 4.430015 hours  
Press [ENTER] to see next plot:

-----  
Quantile Regression for Linear Mixed Model  
-----

Quantile = 0.05 0.25 0.5 0.75 **0.85** 0.95  
Subjects = 235 ; Observations = 7019

-----  
Estimates  
-----

- Fixed effects

|        | Estimate | Std. Error | Inf CI95% | Sup CI95% | z value  | Pr(> z ) |
|--------|----------|------------|-----------|-----------|----------|----------|
| beta 1 | 27.97228 | 1.42043    | 25.18824  | 30.75631  | 19.69286 | 0.00000  |
| beta 2 | 0.04132  | 0.01313    | 0.01559   | 0.06705   | 3.14764  | 0.00165  |
| beta 3 | -0.58146 | 0.12470    | -0.82587  | -0.33705  | -4.66292 | 0.00000  |
| beta 4 | 0.13131  | 0.03383    | 0.06500   | 0.19762   | 3.88101  | 0.00010  |
| beta 5 | -0.71471 | 0.08997    | -0.89105  | -0.53837  | -7.94381 | 0.00000  |
| beta 6 | 3.11409  | 0.09728    | 2.92342   | 3.30476   | 32.01100 | 0.00000  |
| beta 7 | 0.02576  | 0.03215    | -0.03725  | 0.08878   | 0.80134  | 0.42294  |

sigma = 0.52207

ii) Variance-Covariance Matrix

|    | z1       | z2       | z3       |
|----|----------|----------|----------|
| z1 | 23.36092 | 0.04613  | -2.18991 |
| z2 | 0.04613  | 0.02165  | -0.19618 |
| z3 | -2.18991 | -0.19618 | 2.17872  |

-----  
Model selection criteria  
-----

|       | Loglik   | AIC   | BIC      | HQ       |
|-------|----------|-------|----------|----------|
| value | -17952.5 | 35933 | 36028.99 | 35966.07 |

-----  
Details  
-----

Convergence reached? = FALSE  
Iterations = 500 / 500  
Criteria = 0.00065  
MC sample = 20  
Cut point = 0.25  
Processing time = 3.066678 hours

-----  
Quantile Regression for Linear Mixed Model  
-----

Quantile = 0.05 0.25 0.5 0.75 0.85 **0.95**  
Subjects = 235; Observations = 7019

-----  
Estimates  
-----

- Fixed effects

|        | Estimate | Std. Error | Inf CI95% | Sup CI95% | z value  | Pr(> z ) |
|--------|----------|------------|-----------|-----------|----------|----------|
| beta 1 | 31.38118 | 1.39665    | 28.64373  | 34.11862  | 22.46882 | 0.00000  |
| beta 2 | 0.03366  | 0.01578    | 0.00273   | 0.06459   | 2.13293  | 0.03293  |
| beta 3 | -0.38521 | 0.16218    | -0.70309  | -0.06734  | -2.37520 | 0.01754  |
| beta 4 | 0.14515  | 0.03043    | 0.08551   | 0.20480   | 4.76972  | 0.00000  |
| beta 5 | -0.73982 | 0.08494    | -0.90631  | -0.57333  | -8.70959 | 0.00000  |
| beta 6 | 2.28722  | 0.08890    | 2.11298   | 2.46146   | 25.72899 | 0.00000  |
| beta 7 | 0.01328  | 0.03032    | -0.04615  | 0.07271   | 0.43812  | 0.66130  |

sigma = 0.2237

ii) Variance-Covariance Matrix

|    | z1       | z2       | z3       |
|----|----------|----------|----------|
| z1 | 33.52005 | 0.02446  | -2.84757 |
| z2 | 0.02446  | 0.03175  | -0.29260 |
| z3 | -2.84757 | -0.29260 | 3.29493  |

-----  
Model selection criteria  
-----

|       | Loglik    | AIC      | BIC      | HQ       |
|-------|-----------|----------|----------|----------|
| value | -19088.77 | 38205.55 | 38301.54 | 38238.62 |

-----  
Details  
-----

Convergence reached? = FALSE  
Iterations = 500 / 500  
Criteria = 0.00153  
MC sample = 20  
Cut point = 0.25  
Processing time = 3.169162 hours
