# Supplementary material for: Application of quantile mixed-effects model in modeling CD4 count from HIV-infected patients in KwaZulu-Natal South Africa
Source: Springer Nature journal article supplement (doi:10.1186/s12879-021-06942-7), 2022-01-04

**Additional file2:** Graphic overview of convergence for model parameters across all fitted quantiles, produced from the *qrLMM* package using the CAPRISA 002 AI Study data.

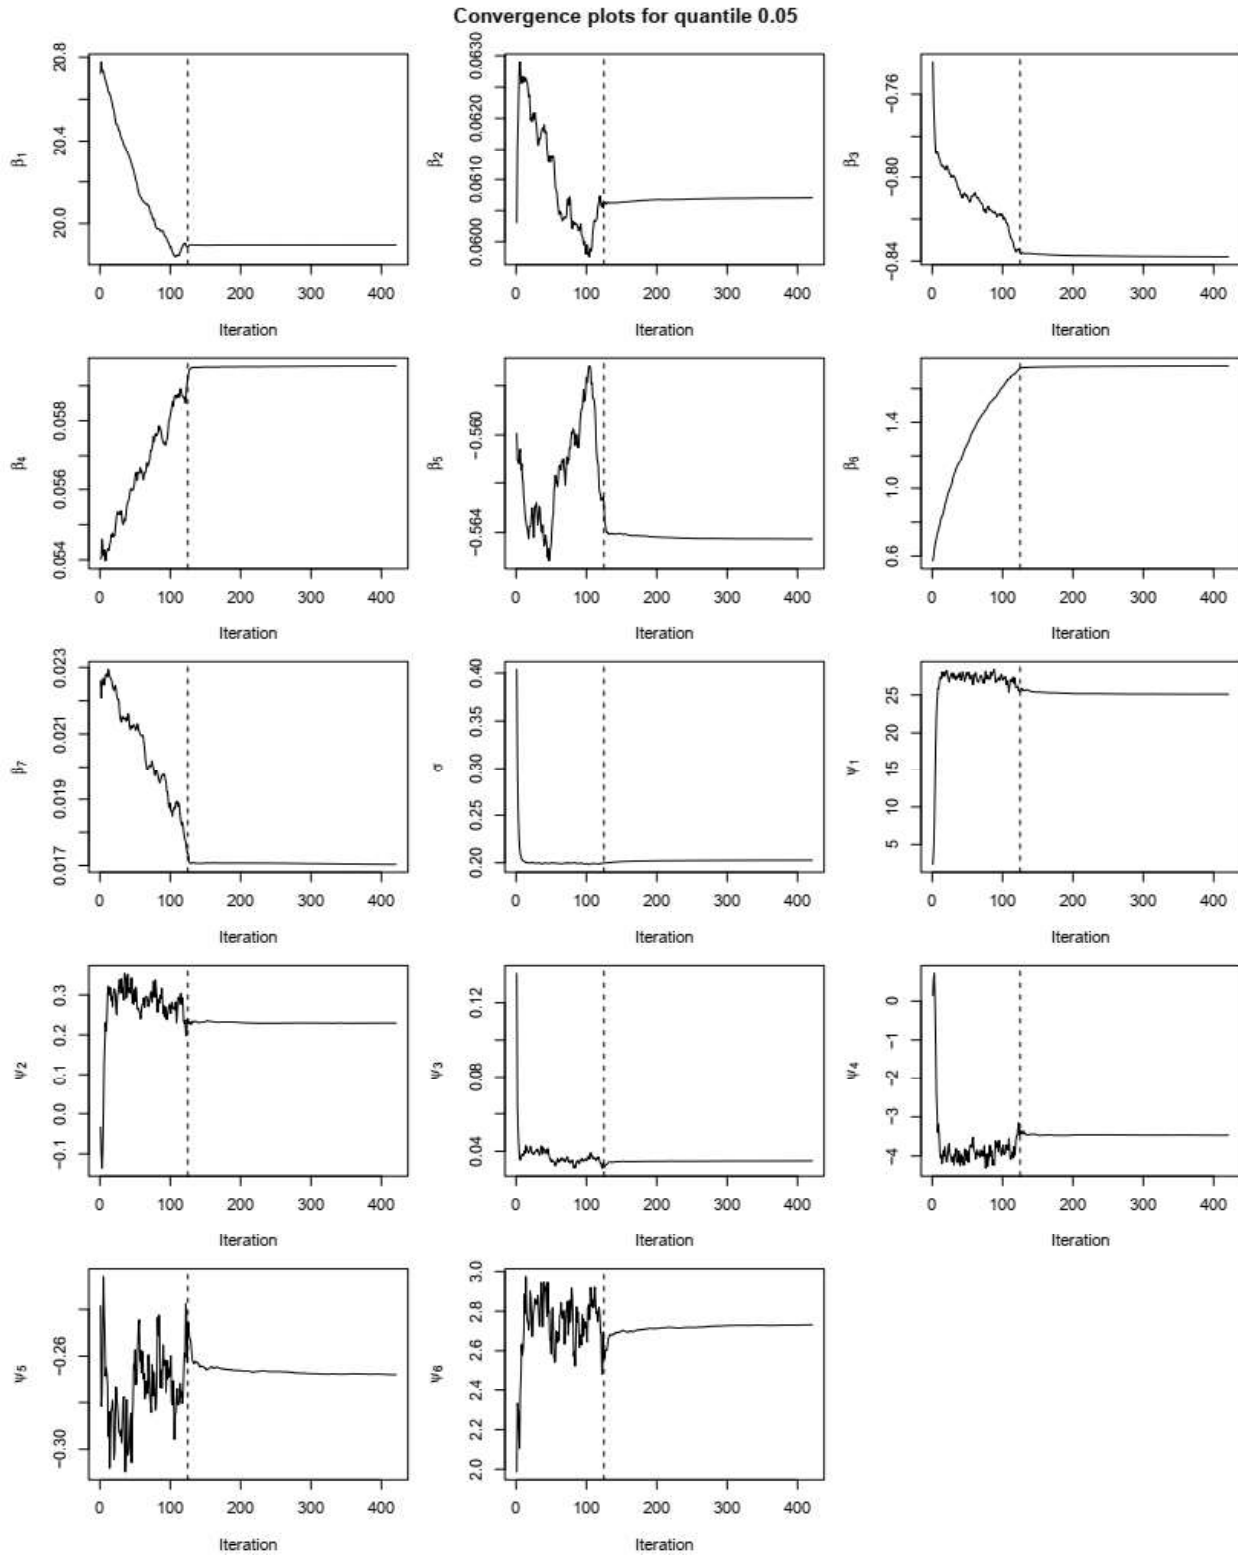

Convergence plots for quantile 0.25

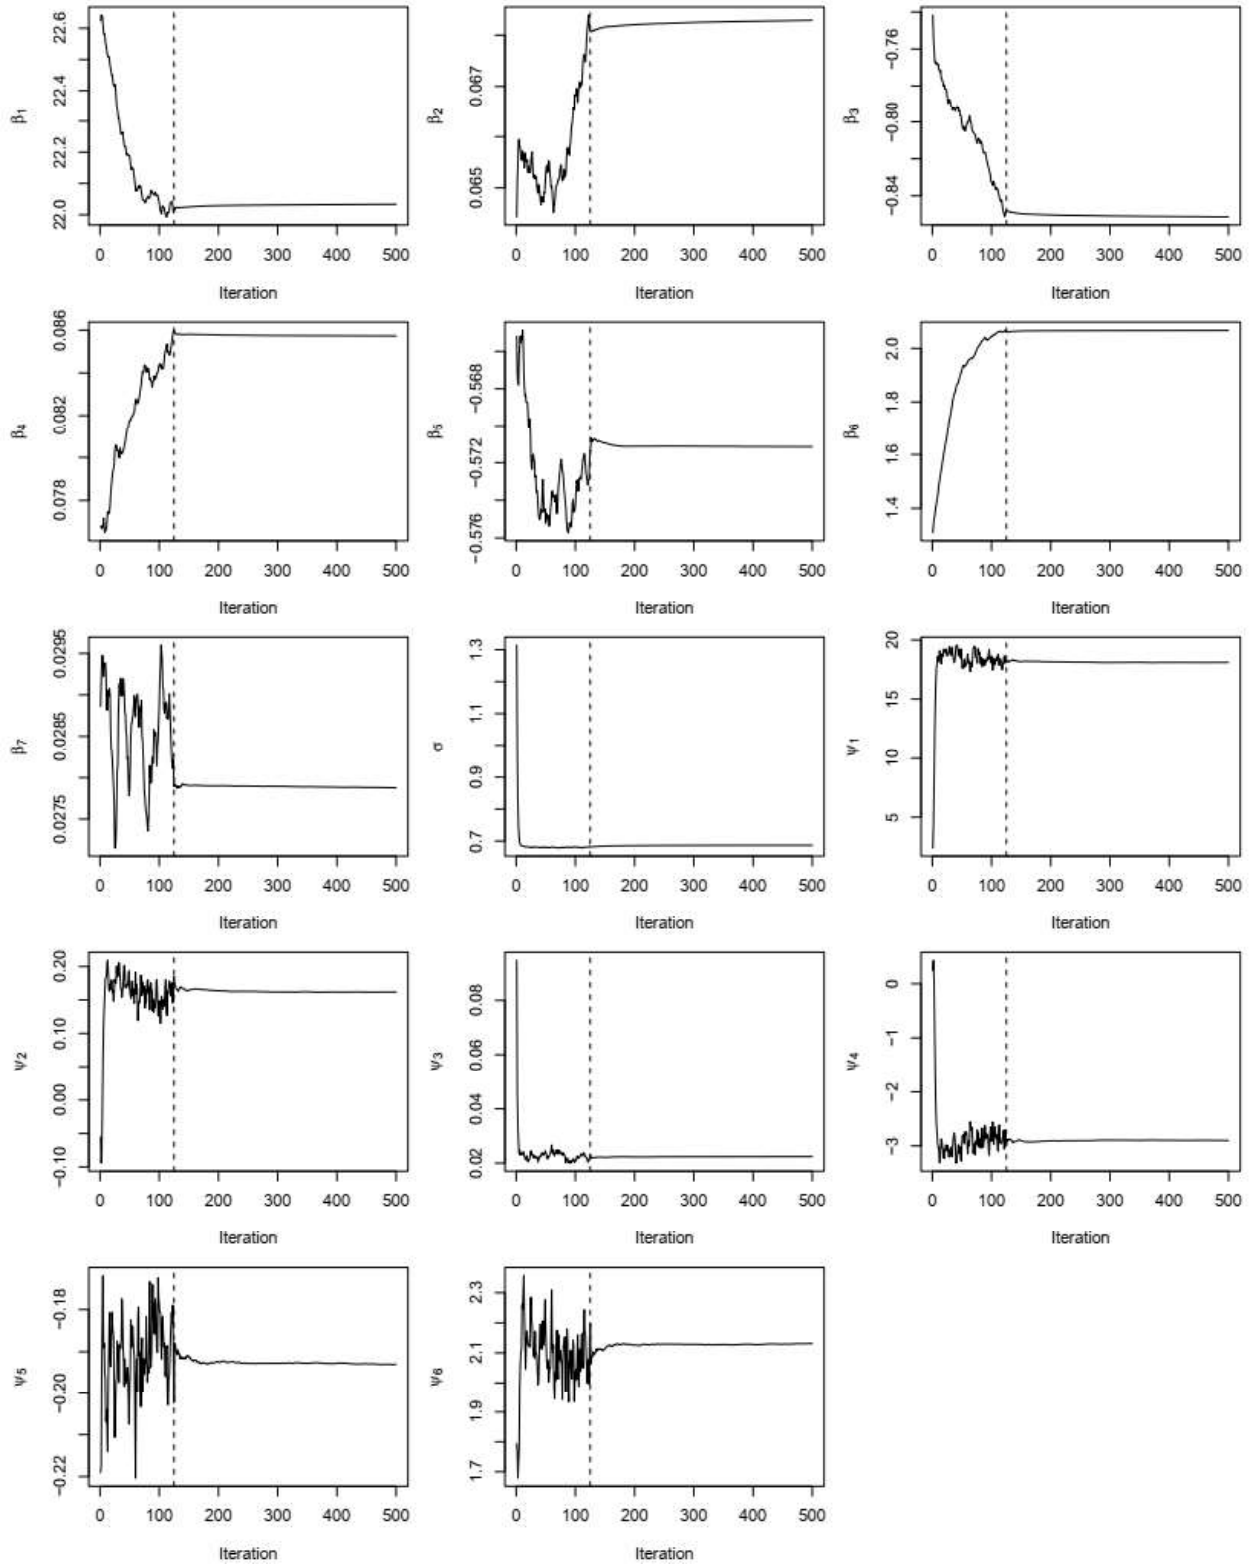

### Convergence plots for quantile 0.5

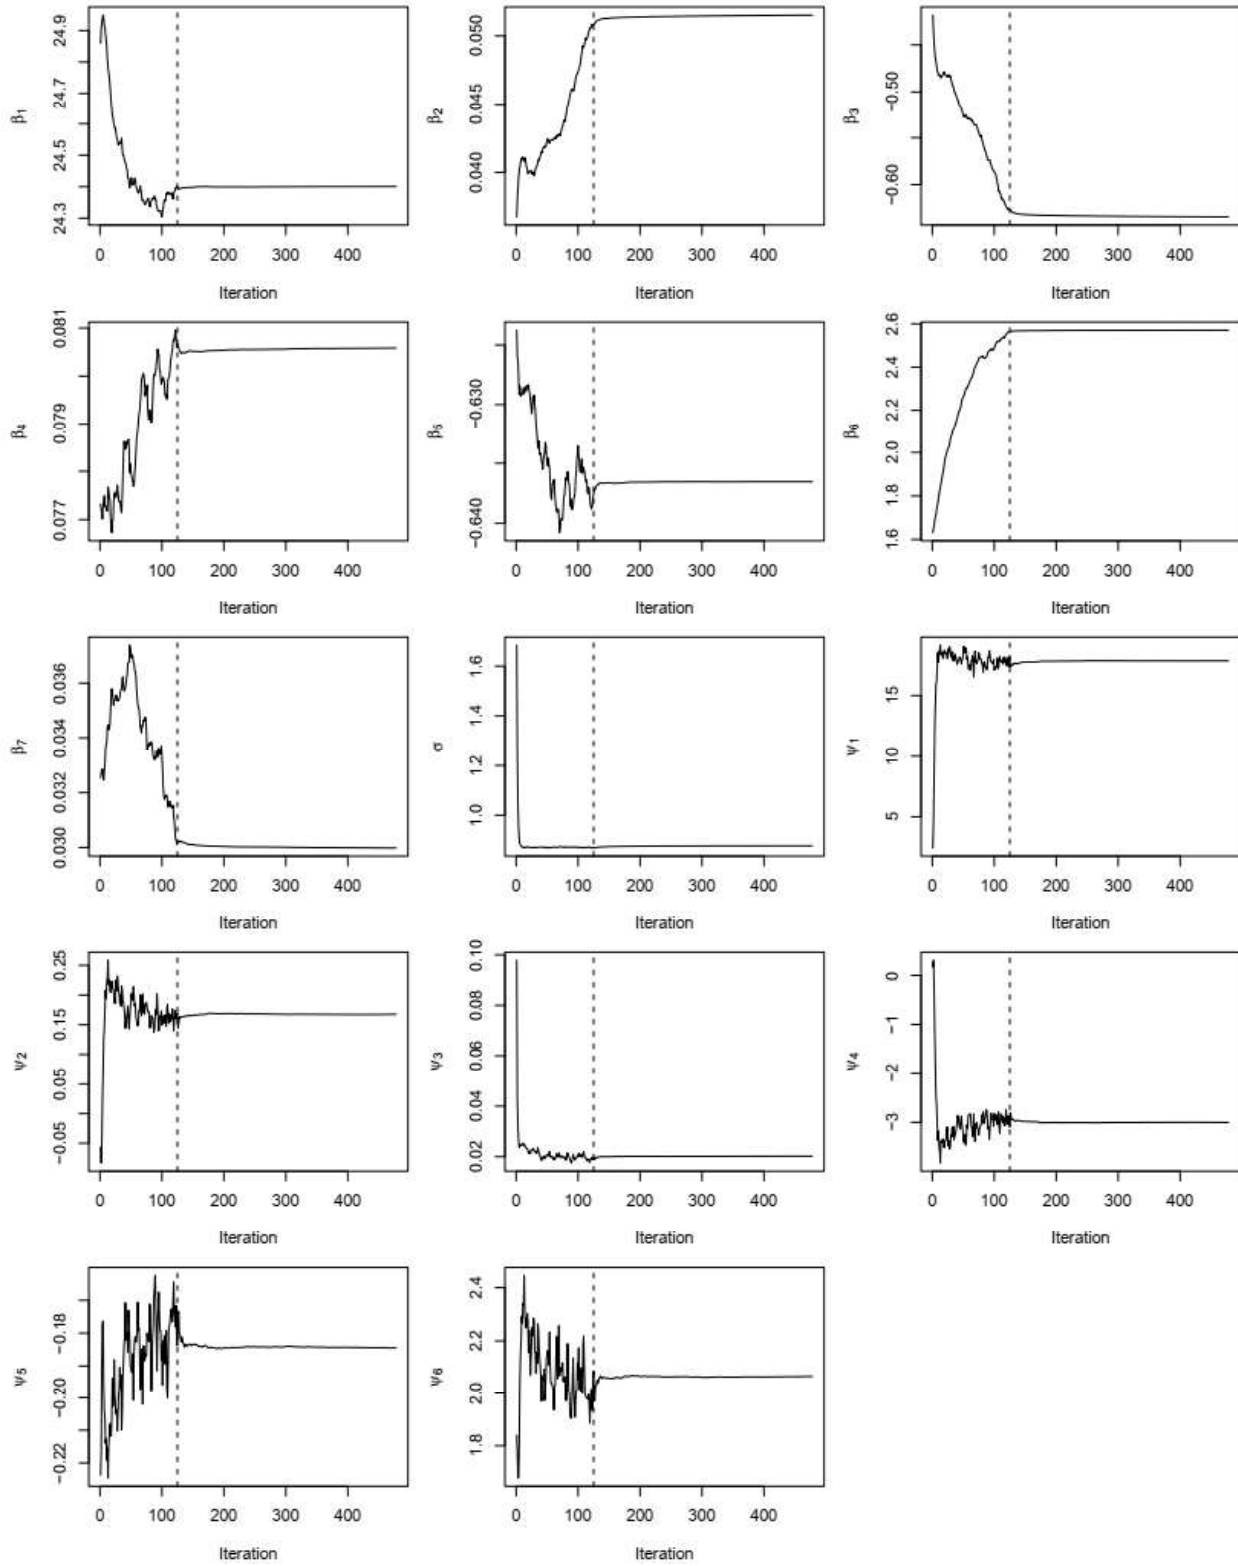

Convergence plots for quantile 0.75

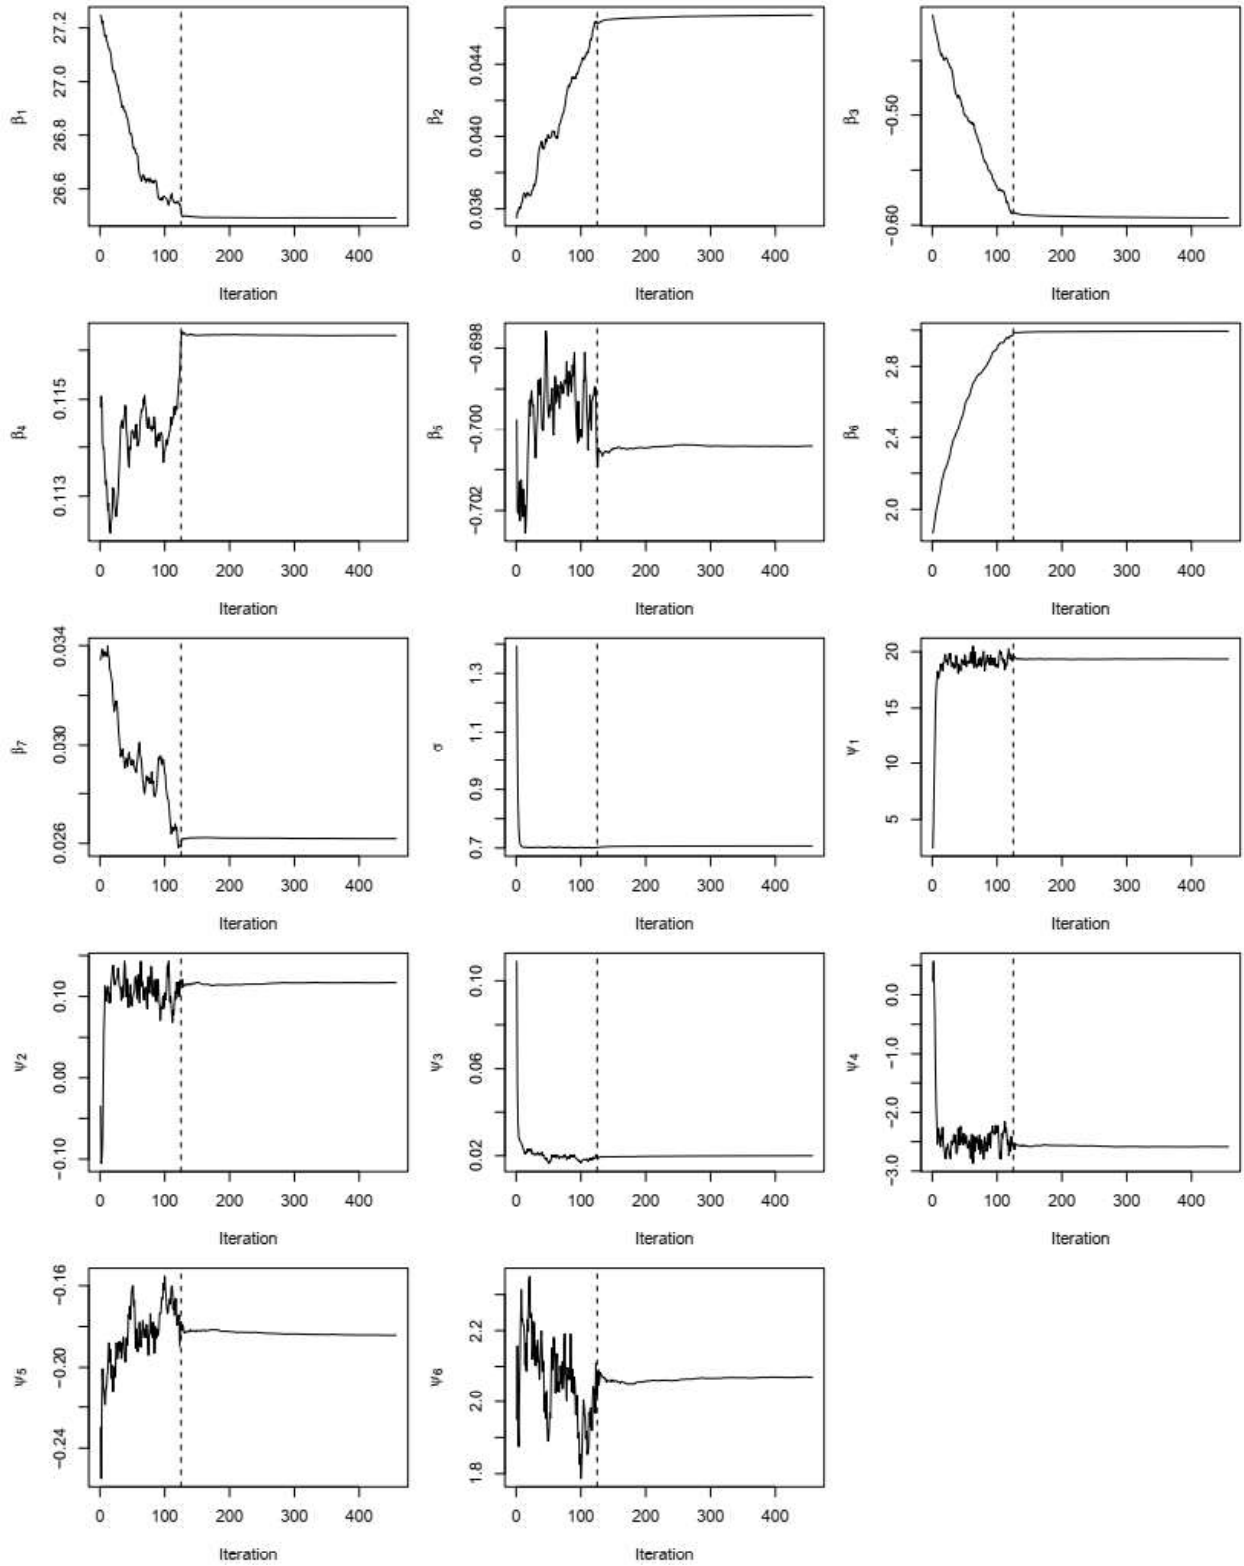

Convergence plots for quantile 0.85

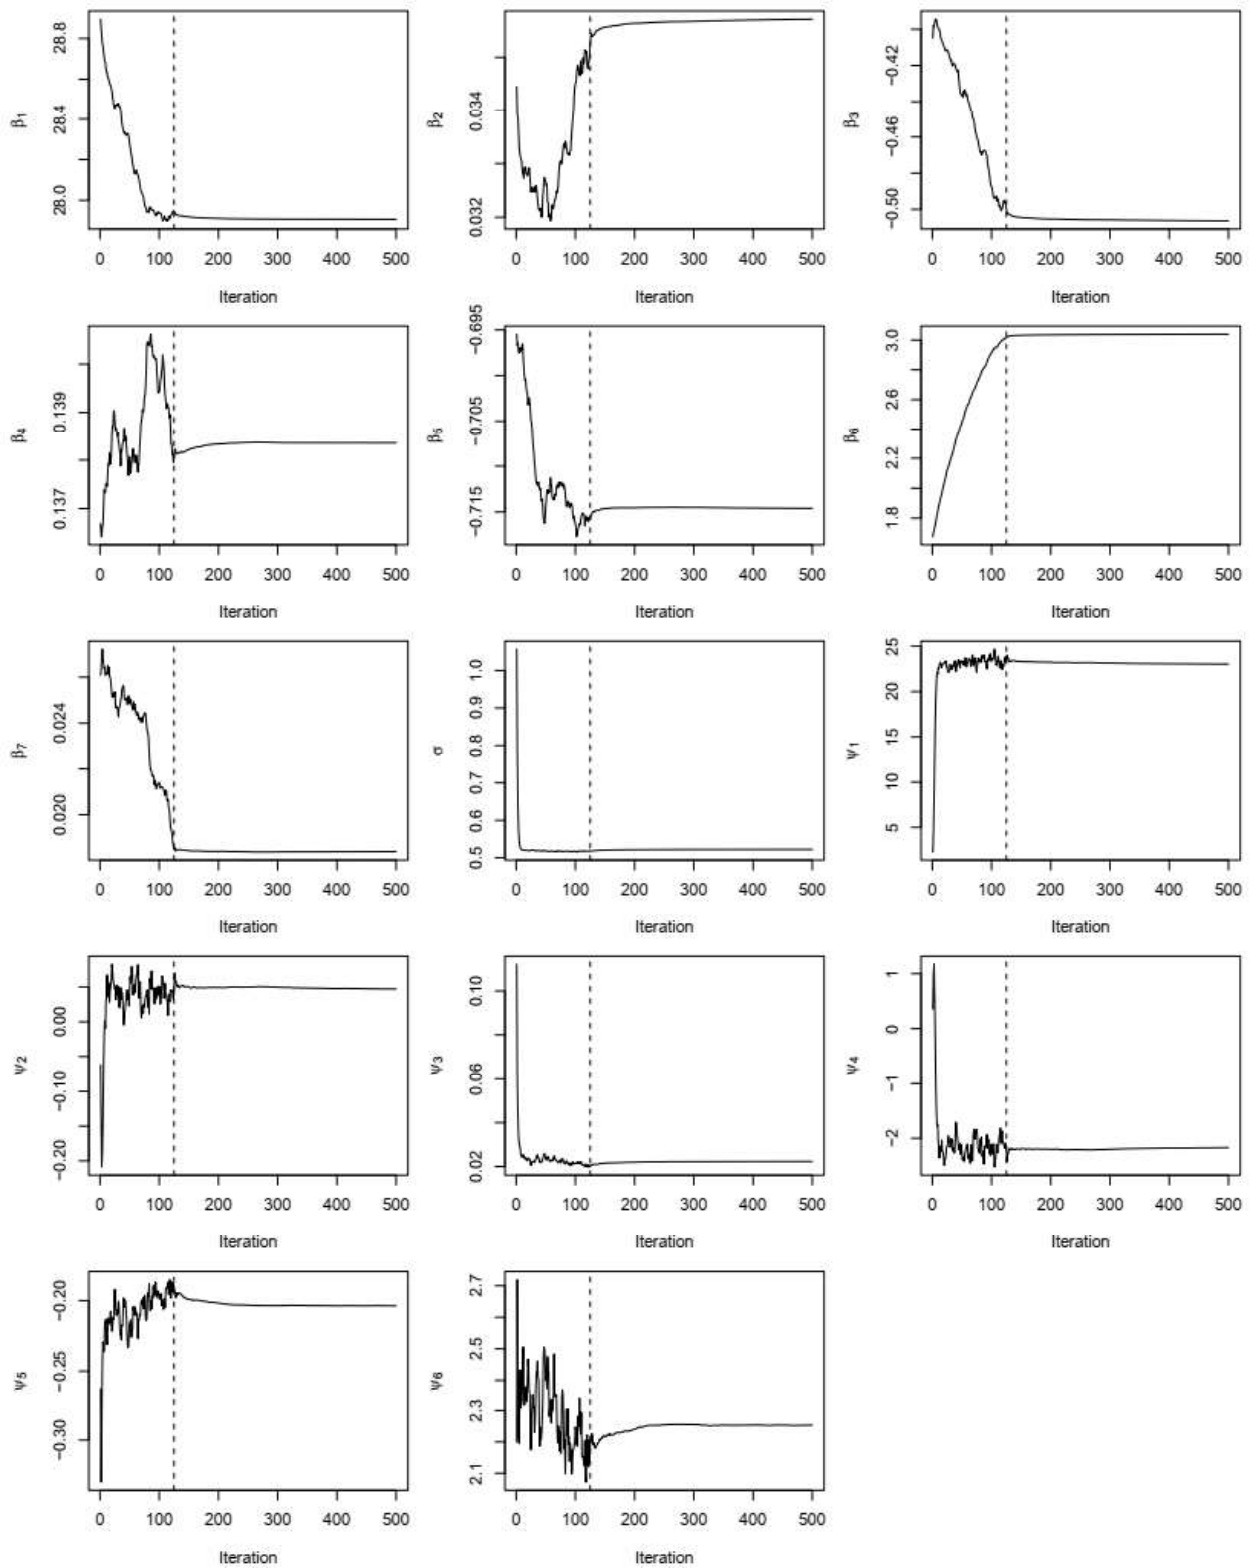

Convergence plots for quantile 0.95

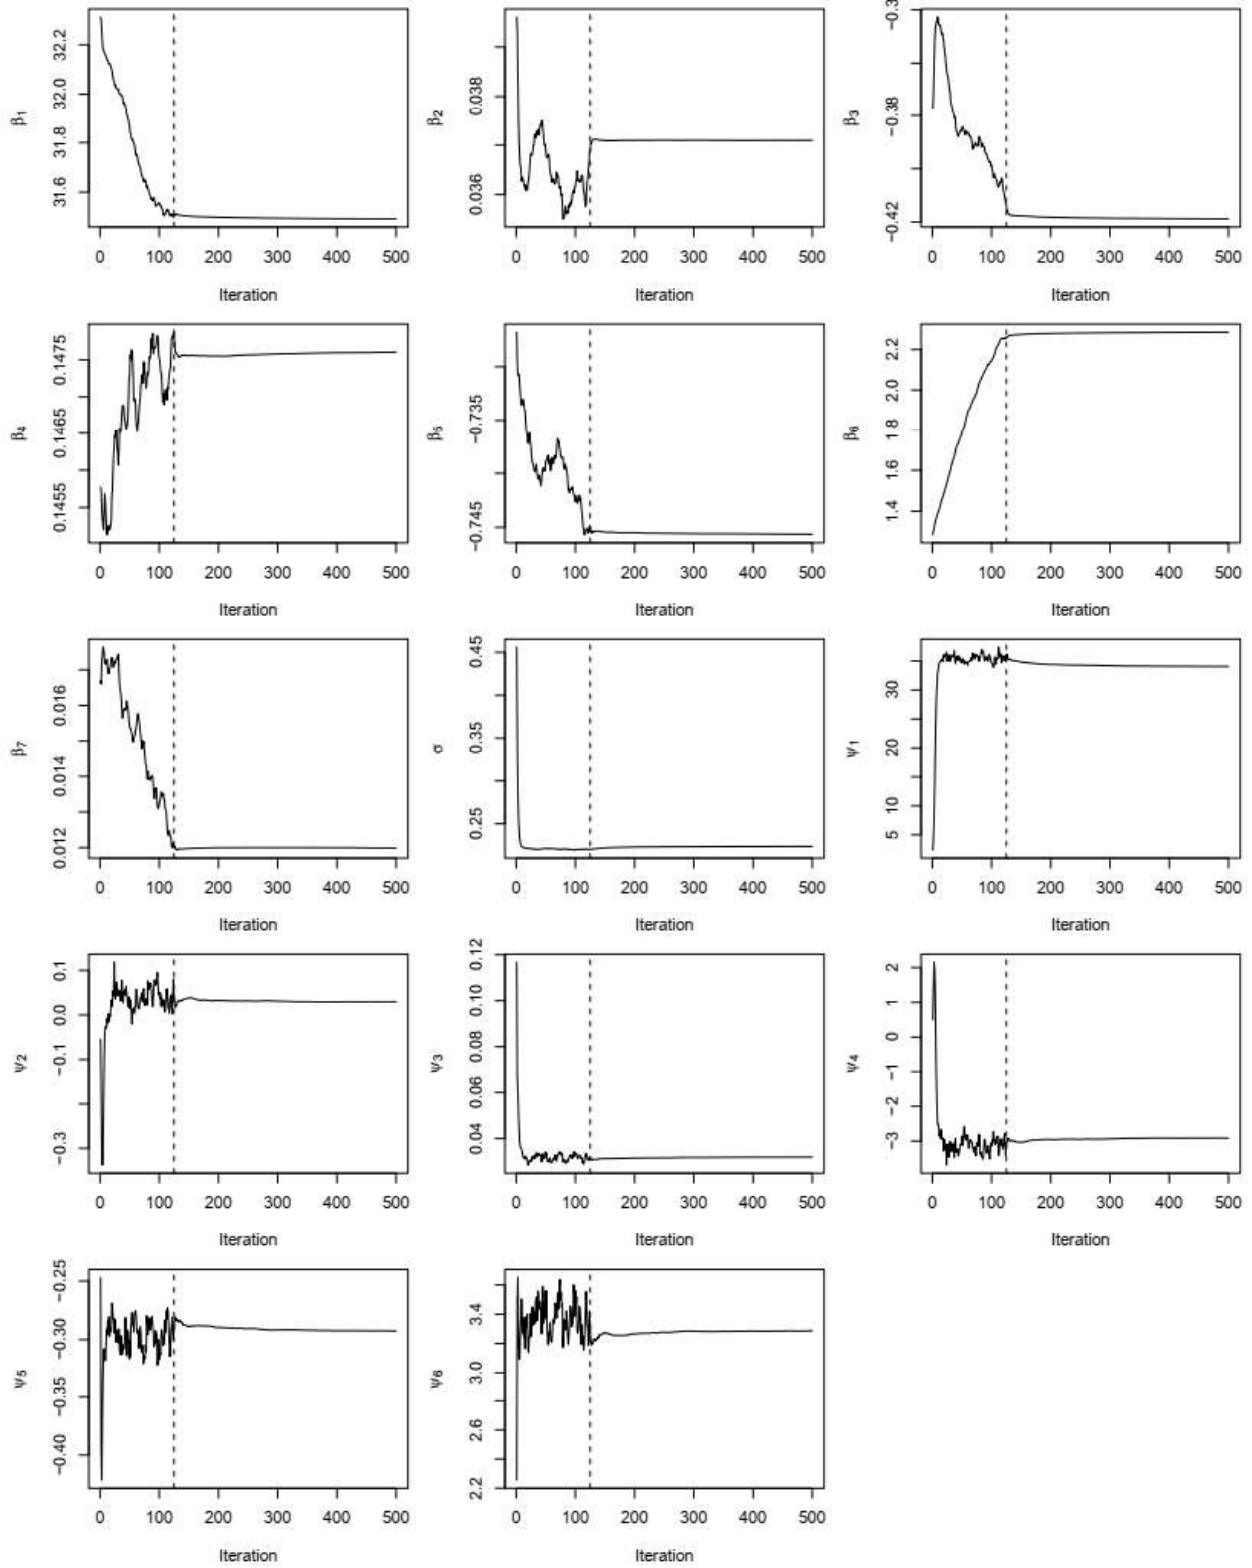

Supplement: MOESM2 [file 19999284]
